# Supplementary material
Source: publisher site journal article supplement (https://www.dovepress.com/article/368285)
Supplement: Supplementary file 1 [file get_supplementary_file.php]

**Supplementary materials**

**Online Supplemental Table 1. The QoR-15 Score**

| Pain | Question 1 | Moderate pain |
| --- | --- | --- |
| Question 2 | Severe pain |
| Physical comfort | Question 3 | Able to breathe easy |
| Question 4 | Have a good sleep |
| Question 5 | Being able to enjoy food |
| Question 6 | Feeling rested |
| Question 7 | Nausea vomiting |
| Physical independence | Question 8 | Able to wash, brush teeth or shave,  Able to look after own appearance |
| Question 9 | Able to return to work, or usual activities |
| Psychological support | Question 10 | Able to communicate with family and friends |
| Question 11 | Getting support from hospital doctors,  Getting support from hospital nurses |
| Emotional state | Question 12 | Having a general feeling of well-being |
| Question 13 | Feeling in control，  feeling comfortable |
| Question 14 | Feeling anxious |
| Question 15 | Feeling depressed |
